# Supplementary material for: The expression of presenilin 1 enhances carcinogenesis and metastasis in gastric cancer
Source: PubMed Central journal article supplement (PMC4891148; doi:10.18632/oncotarget.7298), 2016-02-10
Supplement: oncotarget-07-10650-s001.pdf [file oncotarget-07-10650-s001.pdf]

# The expression of presenilin 1 enhances carcinogenesis and metastasis in gastric cancer

## Supplementary Materials

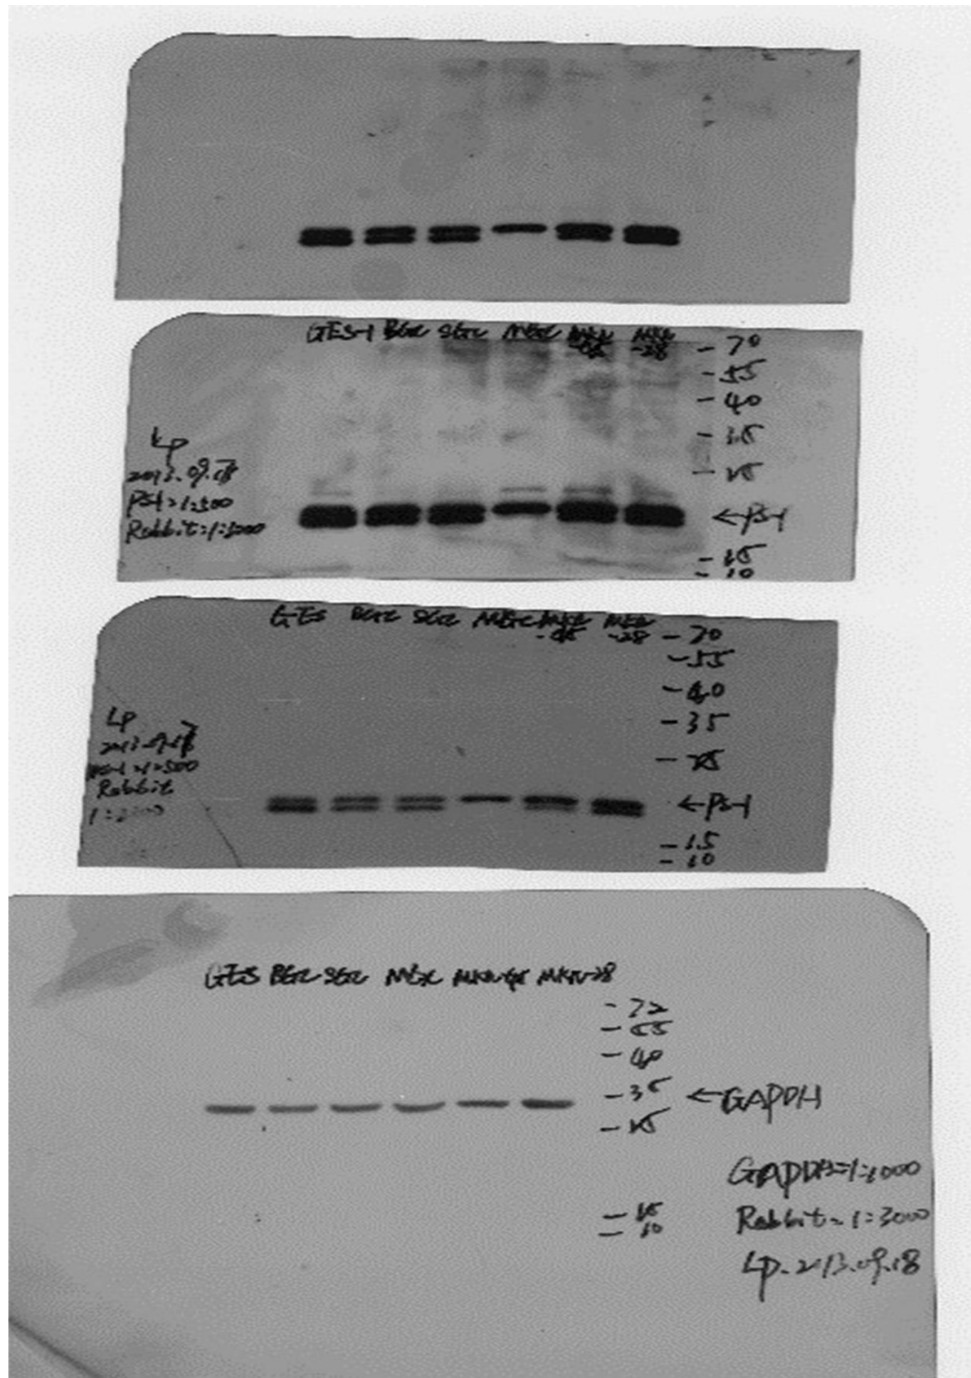

Supplementary Data 1: The photographic plate of the expression level of PS-1(CTF) in different gastric cancer cell lines.

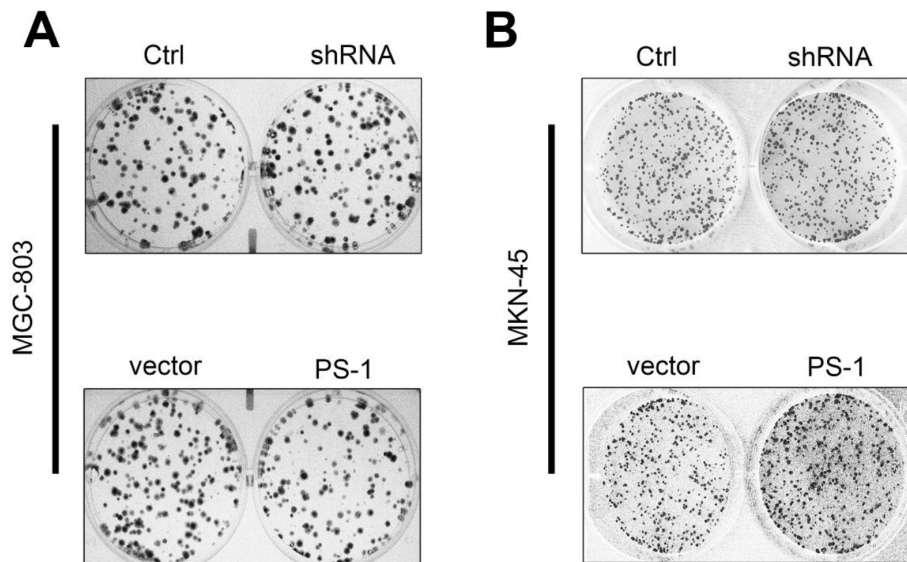

**Supplementary Data 2: Effects of PS-1 on cell proliferation in human GC cells.** (A) and (B) The plate colony formation assay showed no significant difference of knockdown and overexpression PS-1.

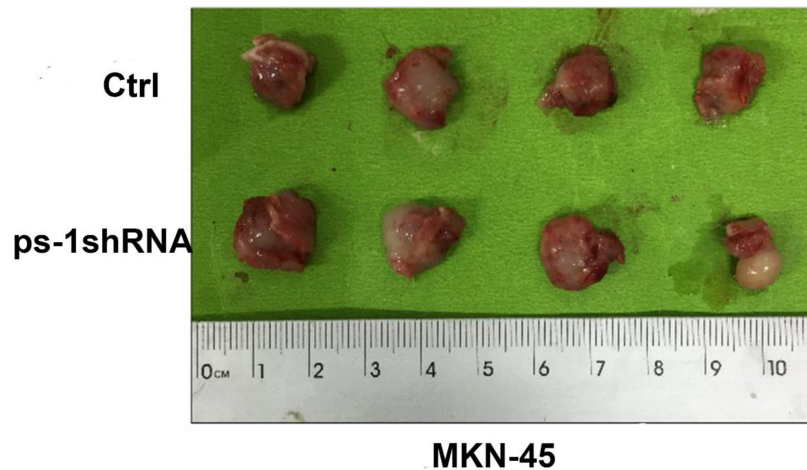

**Supplementary Data 3: Xenograft model shows no significant difference of silencing PS-1 in tumor growth ( $p > 0.05$ ).**

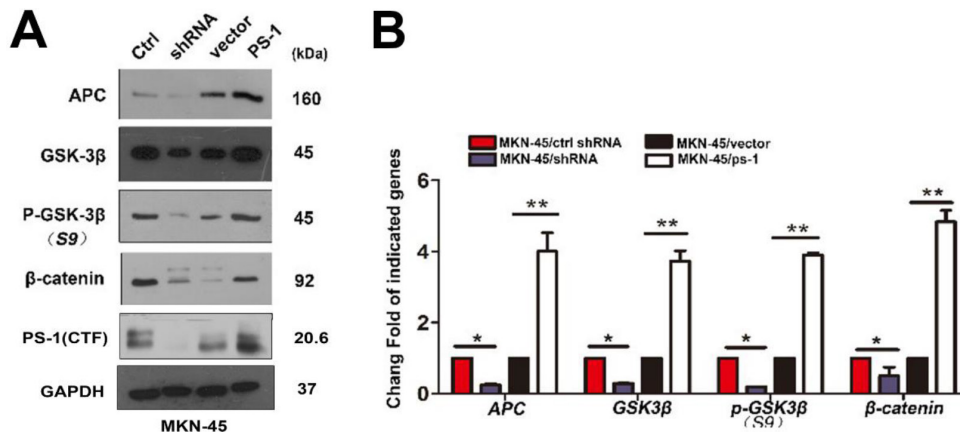

**Supplementary Data 4: Western blot analysis of APC, GSK3β, phospho-GSK3β (S9), β-catenin in MKN-45.** Under silence and overexpression of PS-1, the expression levels of APC, GSK3β, phospho-GSK3β (S9) and β-catenin were detected via western-blot in (A), the quantification of these proteins was analyzed via densitometry shown in (B).
